# Supplementary material
Source: publisher site journal article supplement (https://www.spandidos-publications.com/1868/downloadSupplementary)

Figure S1. The original blots of target proteins in A375 and B16 cells treated with different concentration of pectolinarigenin. (A) Expression of Bcl2, Bax and Cleaved Caspase-3 in A375 cells. (B) Expression of Bcl2, Bax and Cleaved Caspase-3 in B16 cells. (C) Expression of MMP2, MMP9, TIMP2, Stat3 and p-Stat3 in A375 cells. (D) Expression of MMP2 and MMP9 in A375 cells. Protein expression levels were determined by western blotting with  $\beta$ -actin as internal control. The protein band and the loading control that follows were from the different parts of the same gel, and the loading controls and protein bands were grouped together in the figure from different gels. The areas marked by rectangles (black or white) are the positions where target proteins were located. The protein bands of MMP2 and MMP9 in Fig. 4D and Fig. 4E are the same protein bands detected with different antibodies, that exposed after incubation with two antibodies, and the protein band of Bax in Fig. 2E and Cleaved Caspase-3 in Fig. 2D are the same protein detected with different antibodies. MMP, matrix metalloproteinase; TIMP2, tissue inhibitor or metalloproteinases 2; p, phosphorylated.

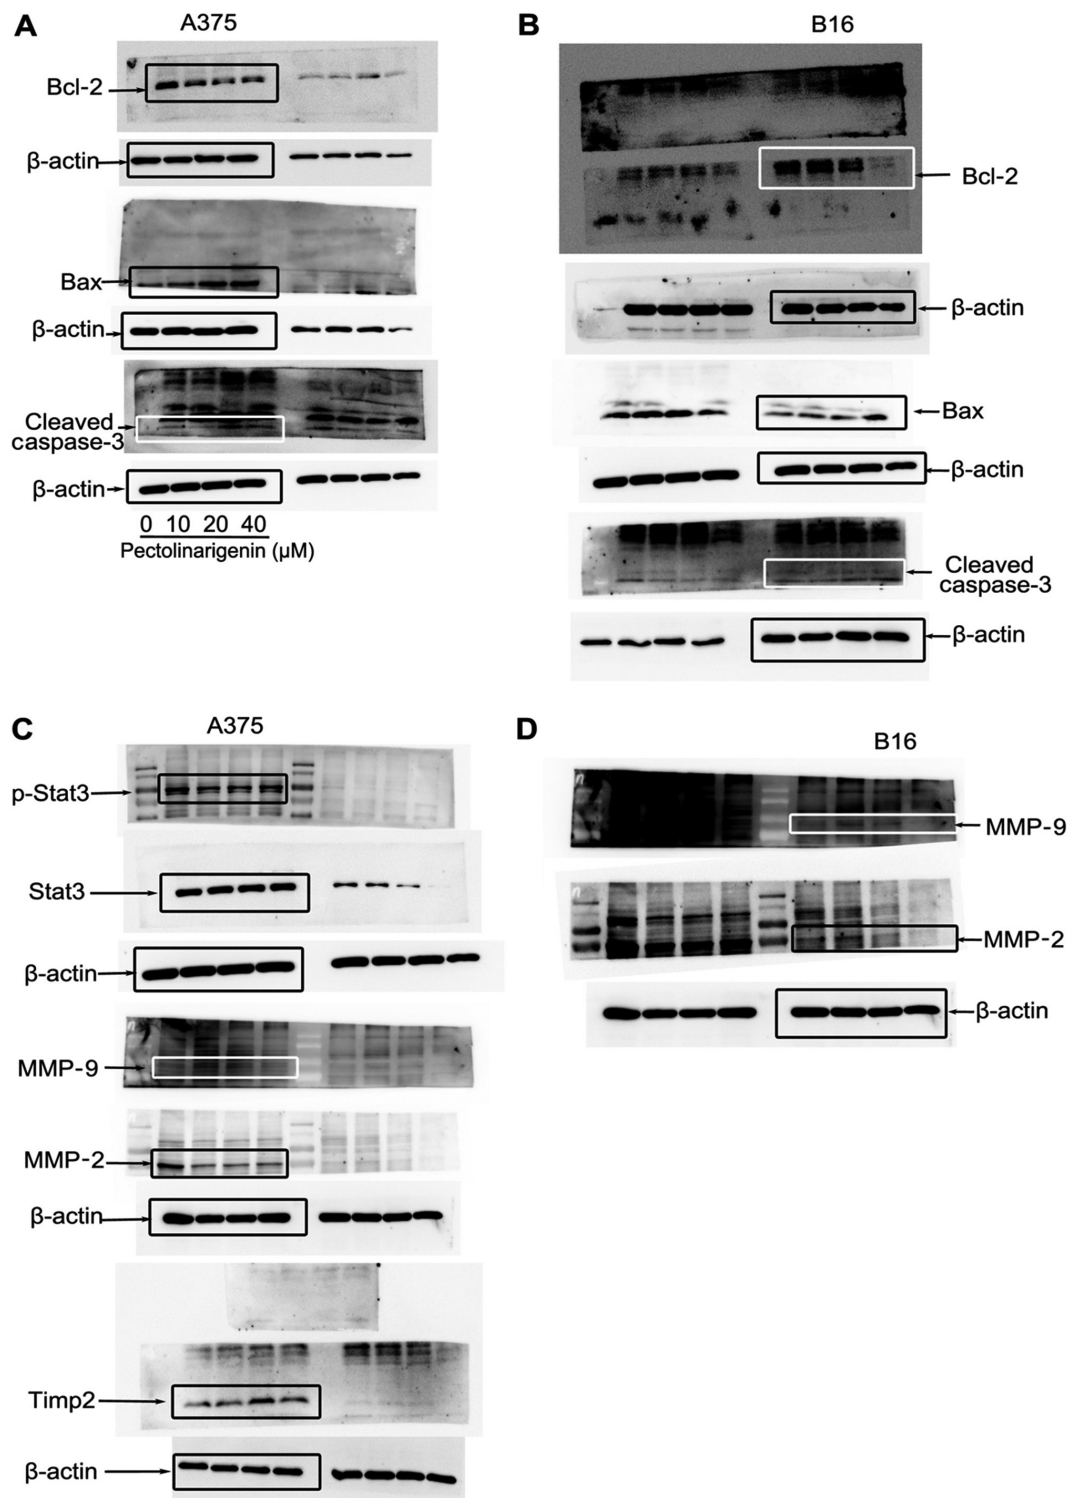

Supplement: Supplementary file 1 [file downloadSupplementary]
